# Supplementary material for: Mechanistic insights into positional and skeletal isomerization of cyclohexene in the H-BEA zeolite
Source: Royal Society of Chemistry journal article supplement (doi:10.1039/d2cp02310e), 2022-01-01
Supplement: d2cp02310e1.pdf [file d2cp02310e1.pdf]

## Supporting Information

### Mechanistic insights into positional and skeletal isomerization of cyclohexene in the H-BEA zeolite

Peng Liu<sup>†</sup>, Qian Liu<sup>†</sup>, Wei Liu<sup>\*‡</sup>, Shaozhong Peng<sup>‡</sup> and Donghai Mei<sup>\*†,§</sup>

<sup>†</sup>*School of Chemical Engineering and Technology, Tiangong University, Tianjin 300387, P. R. China*

<sup>‡</sup>*SINOPEC Dalian Research Institute of Petroleum and Petrochemicals, Dalian, Liaoning Province, 116045, P. R. China*

<sup>§</sup>*School of Environmental Science and Engineering, Tiangong University, Tianjin 300387, P. R. China*

**Table S1.** Detailed parameters for coordination numbers.

| <i>cn</i>                                      | <i>p</i> | <i>q</i> | <i>d</i> <sub>0</sub> |
|------------------------------------------------|----------|----------|-----------------------|
| <i>cn</i> (C2-H <sub>B</sub> )                 | 6        | 6        | 1.6                   |
| <i>cn</i> (C1-H <sub>B</sub> )                 | 6        | 6        | 1.6                   |
| <i>cn</i> (O <sub>A11</sub> -H <sub>B</sub> )  | 6        | 6        | 1.3                   |
| <i>cn</i> (O <sub>A12</sub> -H <sub>61</sub> ) | 6        | 6        | 1.3                   |
| <i>cn</i> (C6-H <sub>61</sub> )                | 6        | 6        | 1.6                   |
| <i>cn</i> (C-C)                                | 6        | 6        | 1.7                   |

*Input file for the cp2k/Quickstep in the ab initio molecular dynamic simulations.*

```
&FORCE_EVAL
  METHOD Quickstep
  &DFT
    LSD
    BASIS_SET_FILE_NAME  ./BASIS
    POTENTIAL_FILE_NAME  ./GTH_POTENTIALS
    WFN_RESTART_FILE_NAME ZSM-5-cyho-RESTART.wfn
  &MGRID
    CUTOFF 360
  &END MGRID
  &QS
    WF_INTERPOLATION ASPC
    EXTRAPOLATION_ORDER 2
  &END QS
  &SCF
    EPS_SCF 1.E-6
    SCF_GUESS RESTART
    MAX_SCF 1000
  &OT
    PRECONDITIONER FULL_SINGLE_INVERSE
    MINIMIZER DIIS
    N_DIIS 7
  &END OT
  &END SCF
  &XC
    &XC_FUNCTIONAL PBE
  &END XC_FUNCTIONAL
  &VDW_POTENTIAL
    DISPERSION_FUNCTIONAL PAIR_POTENTIAL
  &PAIR_POTENTIAL
    TYPE DFTD3
    REFERENCE_FUNCTIONAL PBE
    PARAMETER_FILE_NAME  ./dftd3.dat
    R_CUTOFF 4.0
  &END PAIR_POTENTIAL
  &END VDW_POTENTIAL
  &END XC
  &END DFT
  &SUBSYS
```

```

&CELL
  ABC          12.6614  12.6614  26.4061
  ALPHA_BETA_GAMMA  90.0000  90.0000  90.0000
&END CELL
&TOPOLOGY
  COORD_FILE_NAME  ./bea-t9-cyclo.xyz
  COORD_FILE_FORMAT XYZ
&END
&KIND O
  BASIS_SET DZVP-MOLOPT-SR-GTH-q6
  POTENTIAL GTH-PBE-q6
&END KIND
&KIND H
  BASIS_SET DZVP-MOLOPT-SR-GTH-q1
  POTENTIAL GTH-PBE-q1
&END KIND
&KIND C
  BASIS_SET DZVP-MOLOPT-SR-GTH-q4
  POTENTIAL GTH-PBE-q4
&END KIND
&KIND Si
  BASIS_SET DZVP-MOLOPT-SR-GTH-q4
  POTENTIAL GTH-PBE-q4
&END KIND
&KIND Al
  BASIS_SET DZVP-MOLOPT-SR-GTH-q3
  POTENTIAL GTH-PBE-q3
&END KIND
&END SUBSYS
&END FORCE_EVAL
&GLOBAL
  PROJECT ZSM-5-cyho
  RUN_TYPE MD
  PRINT_LEVEL LOW
&END GLOBAL
&MOTION
  &MD
  ENSEMBLE NVT
  STEPS 5000
  TIMESTEP 0.5
  TEMPERATURE 413.0
  &THERMOSTAT

```

&NOSE  
TIMECON 200  
&END NOSE  
&END THERMOSTAT  
&END MD  
&END MOTION

*Input file for plumed in the metadynamics studying the conformational isomerization of cyclohexene.*

RESTART

UNITS LENGTH=A TIME=fs ENERGY=kcal/mol  
MOLINFO STRUCTURE=./bea-t9-cyclo-select.pdb

cv1: PUCKERING ATOMS=1,2,4,6,5,3

UPPER\_WALLS ARG=cv1.theta AT=3.5 KAPPA=900 LABEL=uwall

LOWER\_WALLS ARG=cv1.theta AT=-0.5 KAPPA=900 LABEL=lwall

METAD ...

LABEL=mwmt

ARG=cv1.theta,cv1.phi

HEIGHT=0.4

SIGMA=0.3,0.5

PACE=30

BIASFACTOR=8

TEMP=413

WALKERS\_ID=0

WALKERS\_N=4

WALKERS\_DIR=./walkers\_exchange

WALKERS\_RSTRIDE=50

... METAD

PRINT STRIDE=1 ARG=cv1.theta,cv1.phi FILE=BIAS

*Input file for plumed in the metadynamics studying the protonation of cyclohexene.*

RESTART

UNITS LENGTH=A TIME=fs ENERGY=kcal/mol  
MOLINFO STRUCTURE=./bea-cyclohexene-pt.pdb

cn\_bhc1: COORDINATION GROUPA=193 GROUPB=195 R\_0=1.6 NN=6 MM=12

cn\_bhc2: COORDINATION GROUPA=193 GROUPB=197 R\_0=1.6 NN=6 MM=12

cn\_bhbo: COORDINATION GROUPA=193 GROUPB=166 R\_0=1.3 NN=6 MM=12

cn\_comb: COMBINE ARG=cn\_bhbo,cn\_bhc1,cn\_bhc2 COEFFICIENTS=1.0,-1.0,-1.0 PERIODIC=NO

cn\_diff: COMBINE ARG=cn\_bhc1,cn\_bhc2 COEFFICIENTS=1.0,-1.0 PERIODIC=NO

METAD ...

LABEL=mwmttd

ARG=cn\_comb,cn\_diff

HEIGHT=0.4

SIGMA=0.2,0.2

PACE=30

BIASFACTOR=8

TEMP=413

WALKERS\_ID=0

WALKERS\_N=4

WALKERS\_DIR=./walkers\_exchange

WALKERS\_RSTRIDE=50

... METAD

***Input file for plumed in the metadynamics studying the positional isomerization of alkene with cyclohexene.***

RESTART

UNITS LENGTH=A TIME=fs ENERGY=kcal/mol

MOLINFO STRUCTURE=./bea-cyhex-h-transfer.pdb

cn\_hboal1: COORDINATION GROUPA=193 GROUPB=91 R\_0=1.3 NN=6 MM=12

cn\_hbc2: COORDINATION GROUPA=193 GROUPB=197 R\_0=1.6 NN=6 MM=12

cn\_hc61oal2: COORDINATION GROUPA=200 GROUPB=166 R\_0=1.3 NN=6 MM=12

cn\_hc61c6: COORDINATION GROUPA=200 GROUPB=194 R\_0=1.6 NN=6 MM=12

cn\_diff1: COMBINE ARG=cn\_hboal1,cn\_hbc2 COEFFICIENTS=1.0,-1.0 PERIODIC=NO

cn\_diff2: COMBINE ARG=cn\_hc61oal2,cn\_hc61c6 COEFFICIENTS=1.0,-1.0 PERIODIC=NO

METAD ...

LABEL=mwmttd

ARG=cn\_diff1,cn\_diff2

HEIGHT=0.3

SIGMA=0.2,0.2

PACE=30

BIASFACTOR=8

TEMP=413

WALKERS\_ID=0

WALKERS\_N=4

WALKERS\_DIR=./walkers\_exchange

WALKERS\_RSTRIDE=50

... METAD

*Input file for plumed in the metadynamics studying the ring contraction of cyclohexene.*

RESTART

UNITS LENGTH=A TIME=fs ENERGY=kcal/mol

MOLINFO STRUCTURE=./ht-b12.pdb

cn\_hboal1: COORDINATION GROUPA=193 GROUPB=166 R\_0=1.3 NN=6 MM=12

cn\_hbc1: COORDINATION GROUPA=193 GROUPB=195 R\_0=1.6 NN=6 MM=12

cn\_c3c4: COORDINATION GROUPA=198 GROUPB=199 R\_0=1.7 NN=6 MM=12

cn\_c2c4: COORDINATION GROUPA=197 GROUPB=198 R\_0=1.7 NN=6 MM=12

cn\_hc41c4: COORDINATION GROUPA=206 GROUPB=198 R\_0=1.6 NN=6 MM=12

cn\_hc41c3: COORDINATION GROUPA=206 GROUPB=199 R\_0=1.6 NN=6 MM=12

cn\_hc21c4: COORDINATION GROUPA=205 GROUPB=198 R\_0=1.6 NN=6 MM=12

cn\_hc21c2: COORDINATION GROUPA=205 GROUPB=197 R\_0=1.6 NN=6 MM=12

cn\_diff1: COMBINE ARG=cn\_hboal1,cn\_hbc1 COEFFICIENTS=1.0,-1.0 PERIODIC=NO

cn\_diff2: COMBINE ARG=cn\_c3c4,cn\_c2c4 COEFFICIENTS=1.0,-1.0 PERIODIC=NO

cn\_diff3: COMBINE ARG=cn\_hc41c4,cn\_hc41c3 COEFFICIENTS=1.0,-1.0 PERIODIC=NO

cn\_diff4: COMBINE ARG=cn\_hc21c4,cn\_hc21c2 COEFFICIENTS=1.0,-1.0 PERIODIC=NO

METAD ...

LABEL=mwmttd

ARG=cn\_diff1,cn\_diff2,cn\_diff3,cn\_diff4

HEIGHT=0.5

SIGMA=0.2,0.2,0.2,0.2

PACE=30

BIASFACTOR=8

TEMP=413

WALKERS\_ID=0

WALKERS\_N=4

WALKERS\_DIR=./walkers\_exchange

WALKERS\_RSTRIDE=50

... METAD
